# Supplementary material
Source: Springer Nature journal article supplement (https://www.springermedizin.de/resource/supplementary/12887_2012_720_MOESM5_ESM.pdf/9475574)
Supplement: MOESM5 [file 9475574]

| Facility                    | F1 | F2 | F3 | F4 | F5 | F6 | F7 | F8 | F9 | F10 | F11 | F12 | F13 | F14 | HW   |
|-----------------------------|----|----|----|----|----|----|----|----|----|-----|-----|-----|-----|-----|------|
| Resuscitation couch         | ■  | ■  | ■  | ■  | ■  | ■  | ■  | ■  | ■  | ■   | ■   | ■   | ■   | ■   | Alw  |
| Oxygen Cylinder             | ■  | ■  | ■  | ■  | ■  | ■  | ■  | ■  | ■  | ■   | ■   | ■   | ■   | ■   | Most |
| Oxygen catheter             | ■  | ■  | ■  | ■  | ■  | ■  | ■  | ■  | ■  | ■   | ■   | ■   | ■   | ■   | Alw  |
| Oxygen mask                 | ■  | ■  | ■  | ■  | ■  | ■  | ■  | ■  | ■  | ■   | ■   | ■   | ■   | ■   | Most |
| Oxygen regulator            | ■  | ■  | ■  | ■  | ■  | ■  | ■  | ■  | ■  | ■   | ■   | ■   | ■   | ■   | Most |
| Heater                      | ■  | ■  | ■  | ■  | ■  | ■  | ■  | ■  | ■  | ■   | ■   | ■   | ■   | ■   | Most |
| Ambulatory bag mask         | ■  | ■  | ■  | ■  | ■  | ■  | ■  | ■  | ■  | ■   | ■   | ■   | ■   | ■   | Alw  |
| Incubator                   | ■  | ■  | ■  | ■  | ■  | ■  | ■  | ■  | ■  | ■   | ■   | ■   | ■   | ■   | Most |
| Phototherapy for Billirubin | ■  | ■  | ■  | ■  | ■  | ■  | ■  | ■  | ■  | ■   | ■   | ■   | ■   | ■   | Occa |
| Burette                     | ■  | ■  | ■  | ■  | ■  | ■  | ■  | ■  | ■  | ■   | ■   | ■   | ■   | ■   | Most |
| Neonatal cannulae           | ■  | ■  | ■  | ■  | ■  | ■  | ■  | ■  | ■  | ■   | ■   | ■   | ■   | ■   | Com  |
| Suction Machine             | ■  | ■  | ■  | ■  | ■  | ■  | ■  | ■  | ■  | ■   | ■   | ■   | ■   | ■   | Alw  |
| Torchfor                    | ■  | ■  | ■  | ■  | ■  | ■  | ■  | ■  | ■  | ■   | ■   | ■   | ■   | ■   | Occa |
| Otoscope examination        | ■  | ■  | ■  | ■  | ■  | ■  | ■  | ■  | ■  | ■   | ■   | ■   | ■   | ■   | Occa |
| Nebulizer                   | ■  | ■  | ■  | ■  | ■  | ■  | ■  | ■  | ■  | ■   | ■   | ■   | ■   | ■   | Occa |
| Thermometer                 | ■  | ■  | ■  | ■  | ■  | ■  | ■  | ■  | ■  | ■   | ■   | ■   | ■   | ■   | Alw  |
| Nasogastric tubes           | ■  | ■  | ■  | ■  | ■  | ■  | ■  | ■  | ■  | ■   | ■   | ■   | ■   | ■   | Com  |
| Weighing scales             | ■  | ■  | ■  | ■  | ■  | ■  | ■  | ■  | ■  | ■   | ■   | ■   | ■   | ■   | Alw  |
| Pulse Oxymeter              | ■  | ■  | ■  | ■  | ■  | ■  | ■  | ■  | ■  | ■   | ■   | ■   | ■   | ■   | Occa |

Key for the availability of essential equipments at the time of visit: ■ Available at the time of visit ■ Not available at the time of visit.

Key for the health workers opinions HW: Never available (Nev) = 0 months, Occasionally available (Occa) = 1 - 3 Months, Commonly available (Com) = 4 - 6 months Most available (Most) = 7 - 9 months, Always (Alw) = 10 -12 months
